# Supplementary material for: A 3D cell culture system for bioengineering human neuromuscular junctions to model ALS
Source: Front Cell Dev Biol. 2023 Feb 14;11:996952. doi: 10.3389/fcell.2023.996952 (PMC9973451; doi:10.3389/fcell.2023.996952)
Supplement: Supplementary file 1 [file Table1.XLSX]

## Sheet: Table 1
Supplementary Table 1: Tested cell numbers and concentrations
	Hydrogel 1	Hydrogel2	Hydrogel 3	Hydrogel 4	Hydrogel 5	Final hydrogel
Myoblasts	10.000	100.000	400.000	1.000.000	1.500.000	1.500.000
	50.000	200.000	600.000	1.500.000	2.000.000
Fibroblasts	0	0	0	75.000	75.000	75.000
Motoneurons	100.000	250.000	500.000	1.000.000	MN clusters	500.000
Geltrex	0 %	10 %	20 %	40 %	40 %	20 %
Fibrinogen	4 mg/ml	6 mg/ml	8 mg/ml	10 mg/ml	10 mg/ml	4 mg/ml
Thrombin	0,8 U	0,8 U	0,8 U	0,8 U	0,8 U	0,8 U
